# Supplementary material
Source: PubMed Central journal article supplement (PMC6614650)
Supplement: ajtr0011-3426-f7.pdf [file ajtr0011-3426-f7.pdf]

The role of ZNF503 in HCC

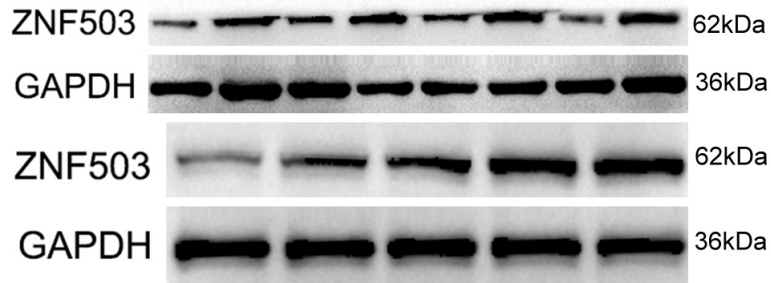

Figure S1. The western images of Figure 1.

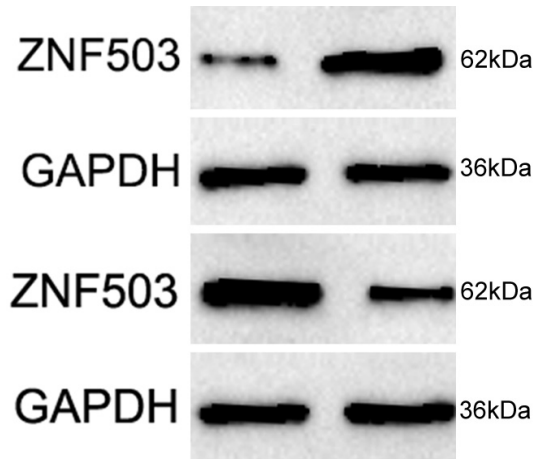

Figure S2. The western images of Figure 3.

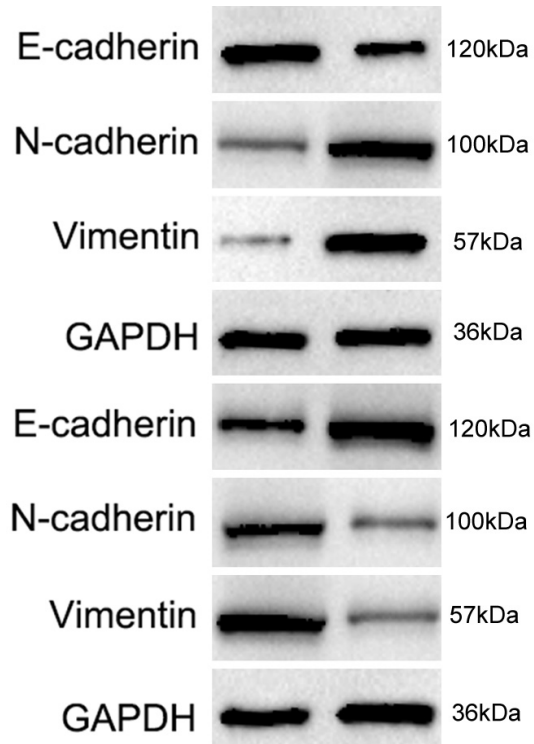

Figure S3. The western images of Figure 4.

The role of ZNF503 in HCC

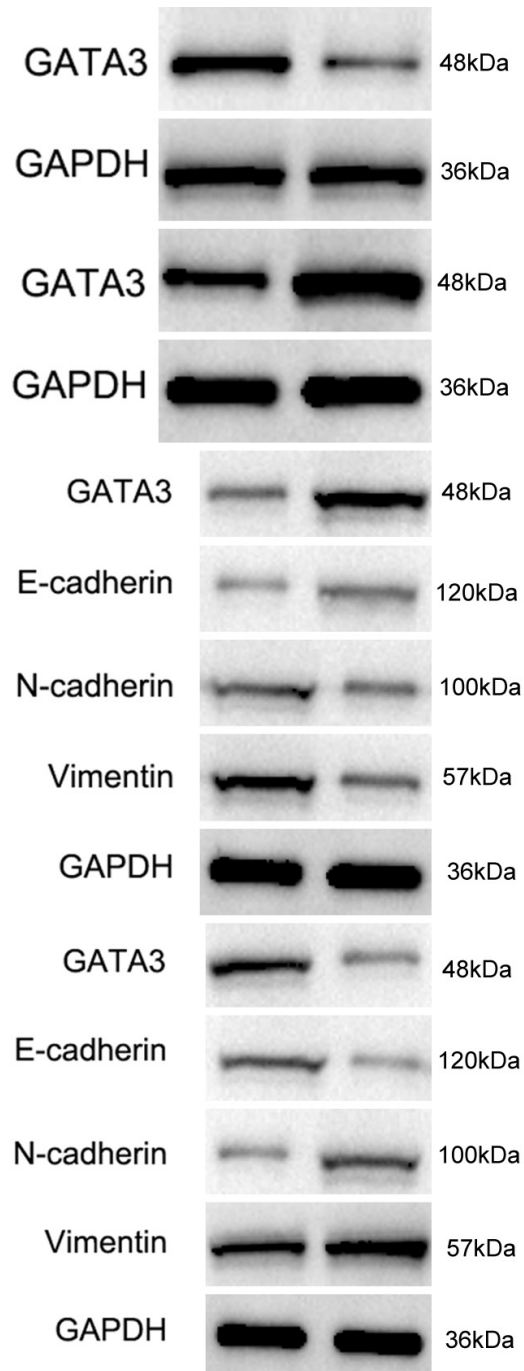

Figure S4. The western images of Figure 5.

The role of ZNF503 in HCC

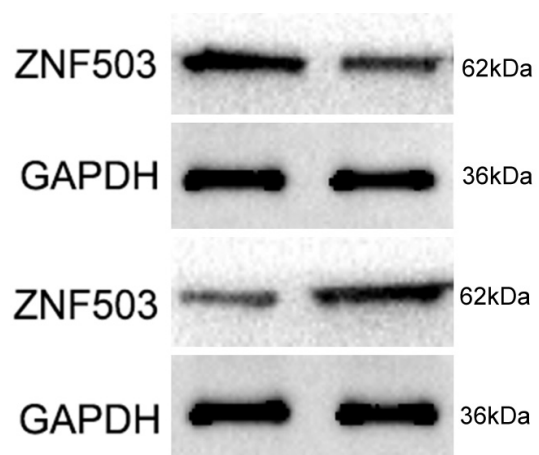

Figure S5. The western images of Figure 6.
